# Supplementary material for: Detection and mapping of illicit drugs and their metabolites in fingermarks by MALDI MS and compatibility with forensic techniques
Source: PubMed Central journal article supplement (PMC4484357; doi:10.1038/srep11716), 2015-06-29
Supplement: srep11716-s1.pdf [file srep11716-s1.pdf]

# **Detection and mapping of illicit drugs and metabolites in fingerprints by MALDI MS and compatibility with forensic techniques**

**G. Groeneveld<sup>1,2±</sup>, M. de Puit<sup>1±</sup>, S. Bleay<sup>3</sup>, R. Bradshaw<sup>2</sup> and S. Francese<sup>2\*</sup>**

<sup>1</sup> Department of Fingerprint Research, Netherlands Forensic Institute, The Hague, Netherlands

<sup>2</sup> Biomedical Research Centre, Sheffield Hallam University, Sheffield, UK

<sup>3</sup> Centre for Applied Science and technology, Home Office, Sandridge, UK

±These authors have equally contributed to the work being presented here

\*Corresponding author, Dr Simona Francese, s.francese@shu.ac.uk

Supplemental material

**Supplemental Figures**

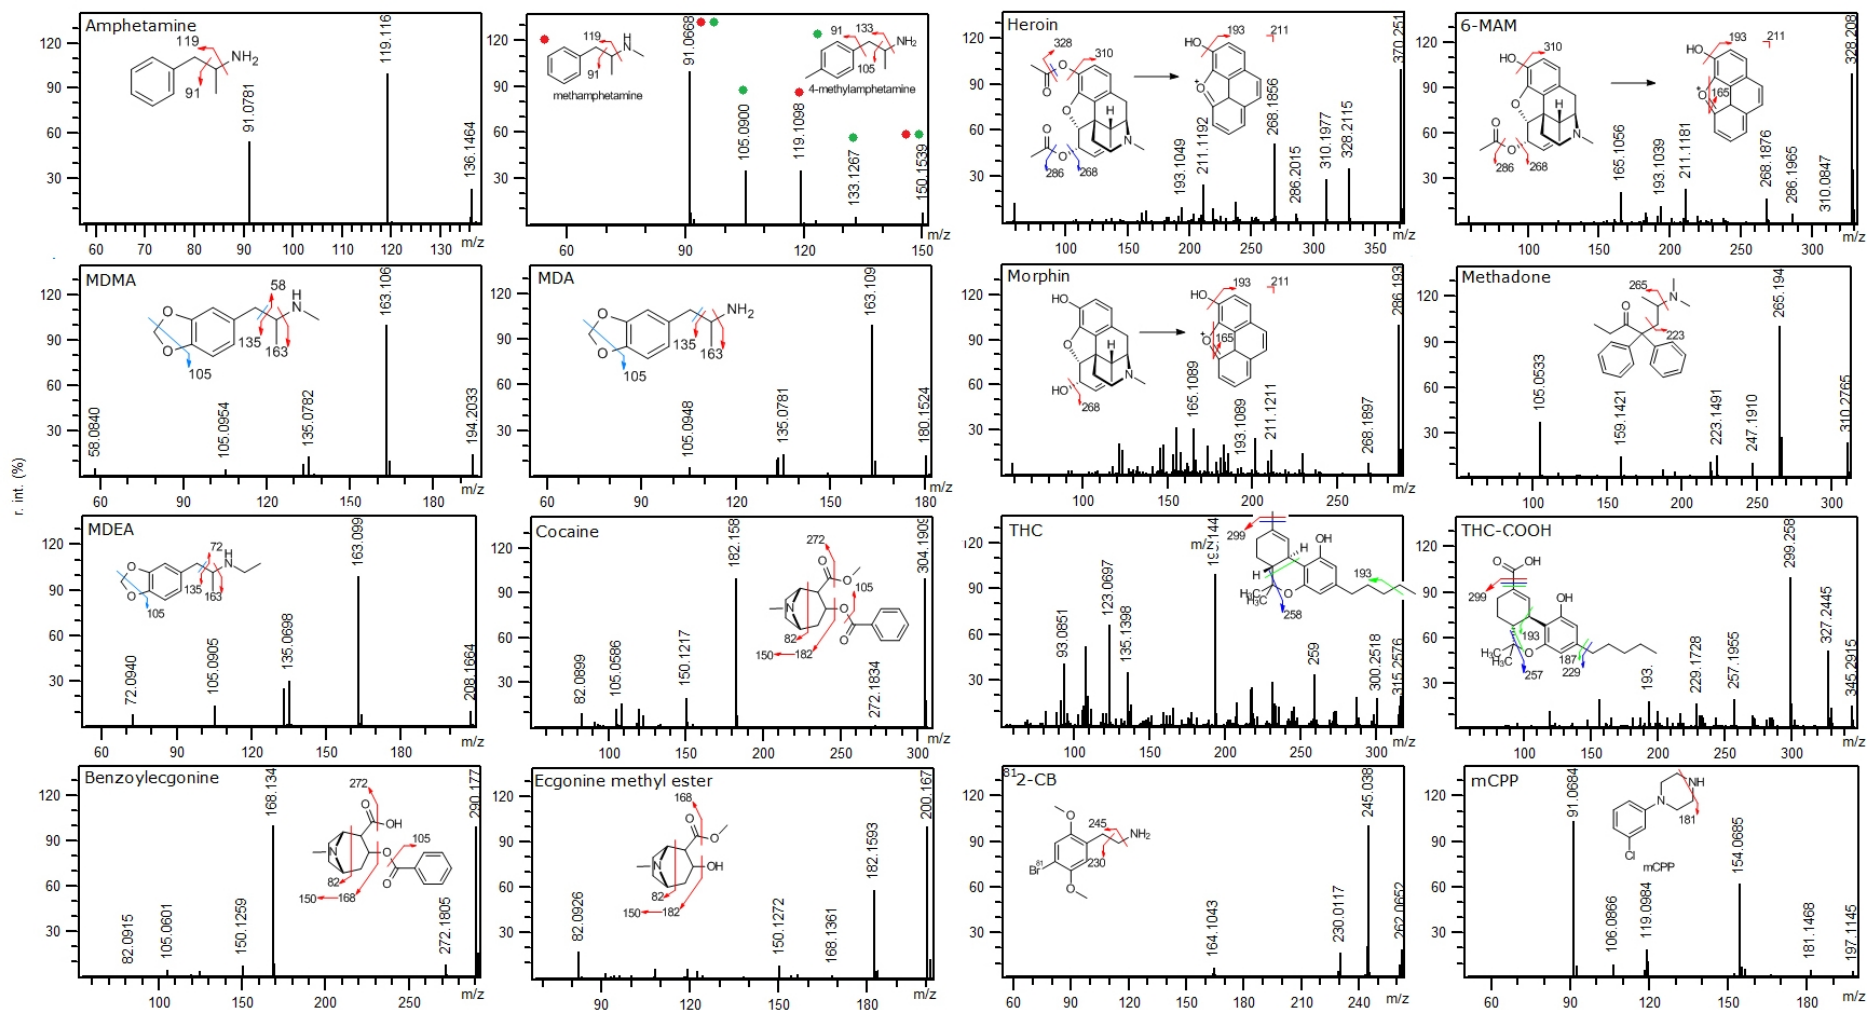

**Fig. S1.** MALDI MS/MS spectra of drug/metabolite precursor ions, showing distinct fragmentation pathways. The proposed fragmentation pattern and corresponding structures are shown. Red arrows indicate the one-step fragmentation of the parent ion, while blue and green arrows show two and three-step fragmentation respectively (progressive fragmentation of a fragmented ion).

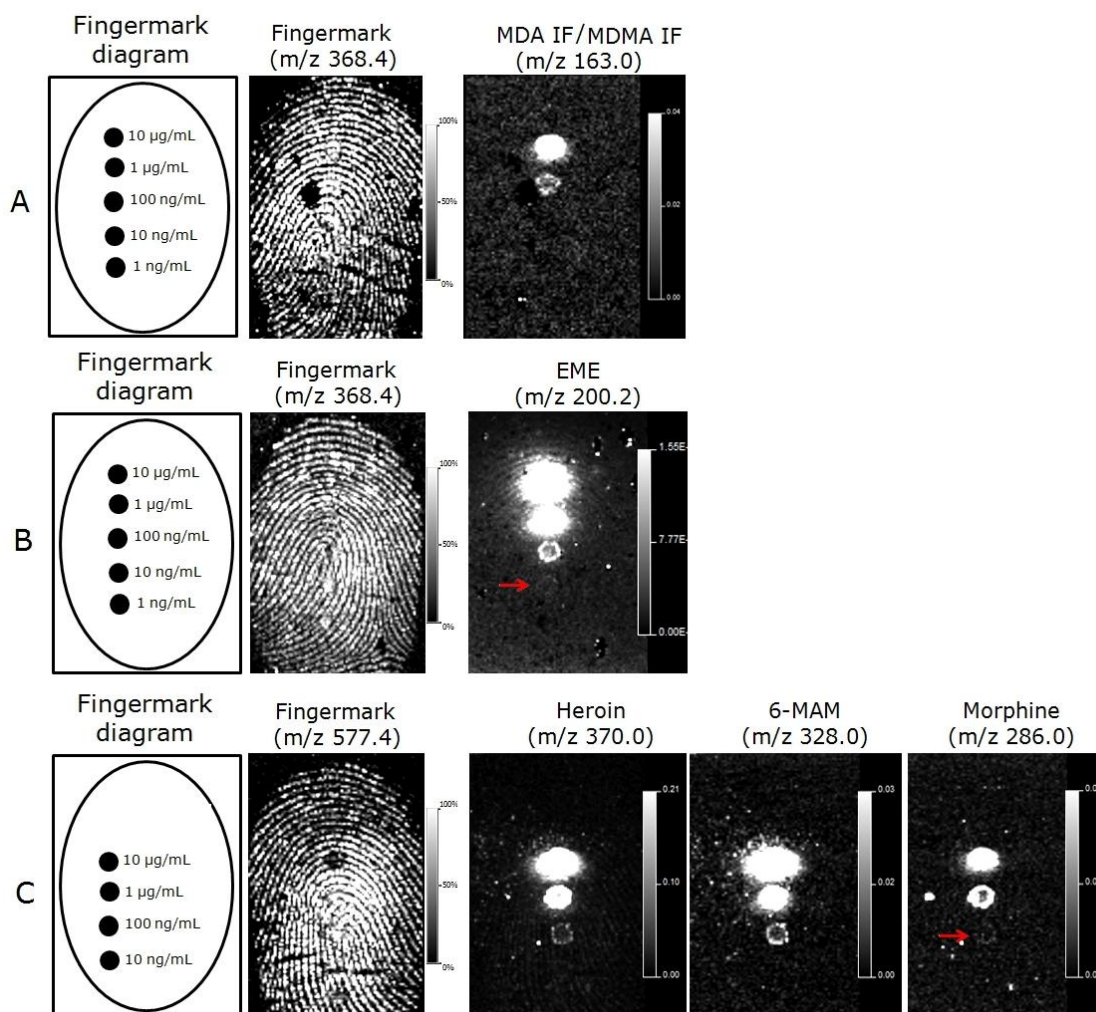

**Fig. S2.** Reprocessing of the data shown in Figure 3 and illustrating MALDI MSI data of drug classes serial dilutions ranging from 10 µg/mL – 1 ng/mL, spotted on top of a fingerprint and subsequently spray-coated. Here images have been brightness-saturated to investigate if additional concentration spots were visible. Images were preliminarily normalised to the matrix peak at m/z 190. Out of all the species investigated, only MDA/MDMA, EME, Heroin, 6-MAM and morphin showed additional concentration spots with respect to Fig 3. In particular, with this reprocessing, MDA/MDMA becomes visible also in the spot at a concentration of 1µg/mL, whereas the remaining species could be mapped in the spots down to 100 ng/mL in concentration.
